# Supplementary material
Source: Springer Nature journal article supplement (https://www.springermedizin.de/resource/supplementary/12884_2008_216_MOESM1_ESM.pdf/9459862)
Supplement: MOESM1 [file 9459862]

|                                    | <b>primary care:</b>                                                              | <b>referrals:</b> | <b>secondary care:</b>                                                             |
|------------------------------------|-----------------------------------------------------------------------------------|-------------------|------------------------------------------------------------------------------------|
| At the start of pregnancy          | ↓ 90,3%                                                                           |                   | 9.7% ↓                                                                             |
| referrals during pregnancy:        |  | 25.3% →<br>← 5.2% |  |
| at onset of labor:                 | ↓ 70.2%                                                                           |                   | 29.8% ↓                                                                            |
| referrals during labor and birth:  |  | 21.4% →           |  |
| at birth:                          | ↓ 48.8%                                                                           |                   | 51.2% ↓                                                                            |
| referrals immediately after birth: |  | ← 45.1%           |  |
| during postpartum period           | 93.9%                                                                             |                   | 6.1%                                                                               |
